1 **Sexual selection does not increase the rate of compensatory adaptation to a**  
2 **mutation influencing a secondary sexual trait in *Drosophila melanogaster***

3

4 Christopher H. Chandler<sup>1,2</sup>, Anna Mammel<sup>1,3</sup>, Ian Dworkin<sup>1,4</sup>

5

6 <sup>1</sup>Department of Integrative Biology, BEACON Center for the Study of Evolution in  
7 Action, Michigan State University, East Lansing, MI, United States

8 <sup>2</sup>Department of Biological Sciences, State University of New York at Oswego, Oswego,  
9 NY, United States

10 <sup>3</sup>Basic Sciences Division, Fred Hutchinson Cancer Research Center, Seattle, WA, USA

11 <sup>4</sup>Department of Biology, McMaster University, Hamilton, Ontario, Canada

12

13 Key Words: sex comb, *sex combs distal*, *scd<sup>1</sup>*, deleterious mutation, *Drosophila*,  
14 compensatory evolution, sexual selection, natural selection

15

16

17 **Abstract**

18           Theoretical work predicts that sexual selection can enhance natural selection,  
19 increasing the rate of adaptation to new environments and helping purge harmful  
20 mutations. While some experiments support these predictions, remarkably little work  
21 has addressed the role of sexual selection on compensatory adaptation—populations'  
22 ability to compensate for the costs of deleterious alleles that are already present. We  
23 tested whether sexual selection, as well as the degree of standing genetic variation,  
24 affect the rate of compensatory evolution via phenotypic suppression in experimental  
25 populations of *Drosophila melanogaster*. These populations were fixed for a  
26 spontaneous mutation causing mild abnormalities in the male sex comb, a structure  
27 important for mating success. We fine-mapped this mutation to an ~85 kb region on the  
28 X chromosome containing three candidate genes, showed that the mutation is  
29 deleterious, and that its phenotypic expression and penetrance vary by genetic  
30 background. We then performed experimental evolution, including a treatment where  
31 opportunity for mate choice was limited by experimentally enforced monogamy.  
32 Although evolved populations did show some phenotypic suppression of the  
33 morphological abnormalities in the sex comb, the amount of suppression did not depend  
34 on the opportunity for sexual selection. Sexual selection, therefore, may not always  
35 enhance natural selection; instead, the interaction between these two forces may  
36 depend on additional factors.

37

## 38 **Introduction**

39           Sexual selection has important impacts on many aspects of how organisms  
40 evolve, including on speciation rates and the degree of sexual dimorphism (e.g., Masta  
41 and Maddison 2002; Ellis and Oakley 2016). It was once thought that sexual selection  
42 may act independently or even antagonistically to other components of natural selection  
43 (e.g. viability and fecundity). However, sexual selection might also be concordant with,  
44 and represent a substantial portion of, the total selection on an allele. If so, sexual  
45 selection on males might also influence the overall mutation load or rate of adaptation,  
46 including in females. For instance, sexual selection may influence how organisms  
47 respond to selective pressures in the short term, influencing how quickly populations  
48 adapt to novel environments, in particular when the population begins at a distance from  
49 an optimum (Long *et al.* 2012). Additionally, some models predict that sexual selection  
50 should help populations filter out harmful mutations more rapidly than selection on other  
51 fitness components (viability and fecundity selection) alone (Agrawal 2001). This  
52 prediction is based partly on the observation that sexual displays are often correlated  
53 with overall condition. Any mutation that reduces an organism's nonsexual fitness is  
54 therefore also likely to affect its mating success (Rowe and Houle 1996; Chandler *et al.*  
55 2013b) or even its success in sperm competition (Clark *et al.* 2012). In those cases,  
56 total selection against such mutations is stronger than it would be without sexual  
57 selection.

58           Empirical support for this scenario has been mixed. In some studies testing these  
59 predictions, evidence supported a role for sexual selection in purging deleterious  
60 mutations or accelerating adaptation (Radwan 2004; Sharp and Agrawal 2008; Hollis *et*

61 *al.* 2009; Jarzebowska and Radwan 2010; McGuigan *et al.* 2011; Long *et al.* 2012;  
62 Almbro and Simmons 2014; Lumley *et al.* 2015; Grieshop *et al.* 2016; Jacomb *et al.*  
63 2016). However, a handful of studies also contradict these predictions (Hollis and Houle  
64 2011; Plesnar *et al.* 2011; Arbuthnott and Rundle 2012; Cabral and Holland 2014;  
65 Chenoweth *et al.* 2015), perhaps because of the confounding effects of sexual conflict,  
66 or because they used large-effect mutations or strong mutagens not representative of  
67 natural variation.

68         Of course, deleterious mutations are not always purged by selection; they can  
69 increase in frequency and occasionally become fixed via drift, hitchhiking, or  
70 antagonistic pleiotropy, especially if their effects on fitness are only mildly deleterious  
71 (and in populations with a small effective population size). In those cases where the  
72 deleterious alleles are difficult for selection to purge, alleles at other loci that  
73 compensate epistatically for the fitness costs of these fixed deleterious alleles may be  
74 favored by selection. There is evidence of compensatory adaptation in both microbial  
75 and multicellular organisms. For instance, alleles conferring antibiotic resistance are  
76 sometimes costly in the absence of antibiotics, but compensatory mutations can reduce  
77 those costs (Reynolds 2000; Maisnier- Patin *et al.* 2002; Comas *et al.* 2012). In the blowfly,  
78 diazinon resistance via alleles at the *Rop-1* gene had negative pleiotropic effects,  
79 increasing fluctuating asymmetry, but these effects were ultimately compensated by  
80 modifiers (McKenzie and Clarke 1988; Davies *et al.* 1996). Additionally, sex  
81 chromosome dosage compensation could also be considered a form of compensatory  
82 adaptation, having likely evolved in response to loss-of-function mutations on Y or W  
83 chromosomes (Charlesworth 1978). In addition, the phenotypic expression (penetrance

84 and expressivity) of many mutations can be strongly influenced by genetic background  
85 (e.g., Chandler *et al.* 2013a, 2017; Mullis *et al.* 2018; Hou *et al.* 2019). Thus, selection  
86 favoring suppressor alleles at other loci may also contribute to compensatory adaptation  
87 by limiting the phenotypic expression of a deleterious mutation.

88         Although sexual selection has received a lot of attention as a possible influence  
89 on the rate of purging of deleterious mutations, the role of sexual selection in  
90 compensatory evolution remains largely unexplored. Nevertheless, we might similarly  
91 predict that sexual selection can also accelerate compensatory adaptation, especially if  
92 sexual displays are condition dependent. In one study (Pischedda and Chippindale  
93 2005), the *nub*<sup>1</sup> mutation, which drastically reduces the size of the wing, resulting in an  
94 inhibition of males' ability to generate courtship songs, was fixed in experimental  
95 populations of *Drosophila melanogaster*. As predicted, this mutation had greater fitness  
96 costs in males than it did in females, but males also showed greater compensatory  
97 fitness recovery over 180 generations (albeit without compensating for the effects on  
98 wing morphology directly; A. Chippindale, personal communication), providing some  
99 support that sexual selection may enhance compensatory adaptation. However, this  
100 study was not replicated (only a single lineage), since the *nub*<sup>1</sup> populations were  
101 originally generated for other purposes. Clearly, more study is needed on whether  
102 sexual selection can speed up compensatory adaptation.

103         In this study, we address the question of whether sexual selection can impact the  
104 rate of compensatory evolution (via phenotypic suppression) using experimental  
105 evolution in *Drosophila melanogaster*. We chose a mutation in the *sex combs distal*  
106 gene (*scd*<sup>1</sup>) (Boube *et al.* 1997; Randsholt and Santamaria 2008), a spontaneous,

107 partially penetrant mutation affecting the development of the male sex comb, a structure  
108 critical for male mating success (Ng and Kopp 2008) and rapidly evolving across  
109 *Drosophila* species (Atallah *et al.* 2009, 2012; Kopp 2011; Malagón *et al.* 2014). First,  
110 we further mapped the mutation and characterized its effects across different wild type  
111 genetic backgrounds; because we found abundant genetic variation in natural  
112 populations modifying its penetrance and expressivity, we next focused on  
113 compensatory adaptation via phenotypic suppression in experimentally evolved  
114 populations. Despite a general compensatory response, we observed no evidence that  
115 sexual selection influenced the rate of compensatory evolution via phenotypic  
116 suppression of the sex comb phenotypes.

117

## 118 **Methods**

119 All data and scripts are available on Github (<https://github.com/DworkinLab>).

120 *Mapping scd<sup>1</sup>*—

121 *sex combs distal<sup>1</sup>* (*scd<sup>1</sup>*) is a spontaneous X-linked allele resulting in ectopic sex comb  
122 bristles on the second tarsal segment of the prothoracic leg in males (Boube *et al.*  
123 1997). In the base stock (Bloomington *Drosophila* Stock Center strain #5070, *y<sup>1</sup> scd<sup>1</sup>*  
124 *ras<sup>1</sup> v<sup>1</sup> f<sup>1</sup>*), it has incomplete penetrance, with only about 70% of males showing the  
125 ectopic sex comb bristles (Figure 1), and no visible phenotype in homozygous or  
126 heterozygous females. In our populations, males also sometimes exhibited minor  
127 defects in the primary sex comb, such as a gap or partially untransformed bristles.

128         The identity of the gene and molecular lesion of this allele are unknown, although  
129 some previous recombination mapping suggested it was near 1-30.6, and that a local

130 duplication of the 8C-9B region of the X chromosome onto the Y (*DP(1:Y)FF*), could  
131 partially rescue the phenotype of *scd<sup>1</sup>* (Santamaria and Randsholt 1995; Randsholt and  
132 Santamaria 2008). We attempted to further fine map the gene through duplication  
133 mapping. Virgin female flies of strain BDSC 5070 (*y<sup>1</sup> scd<sup>1</sup> ras<sup>1</sup> v<sup>1</sup> f<sup>1</sup>*) were crossed to  
134 males of strains carrying duplicated segments of the X chromosome translocated onto  
135 the Y chromosome or chromosome III (Table 1; Cook *et al.* 2010; Venken *et al.* 2010),  
136 and the male offspring were scored for the presence of mutant phenotypes, such as the  
137 ectopic sex comb or disruptions in the primary sex comb. Assuming *scd<sup>1</sup>* is a recessive  
138 loss-of-function allele, if the duplicated segment contains a functional wild-type copy of  
139 the *scd* gene, then the mutant phenotype would be rescued and no male offspring from  
140 these crosses would show sex comb defects. Because *scd<sup>1</sup>* is only partially penetrant,  
141 we scored numerous male offspring from each cross.

#### 142 *Influence of genetic background on penetrance and expressivity—*

143 To determine the extent of genetic variation for the penetrance and expressivity  
144 of *scd<sup>1</sup>*, we crossed virgin female *y<sup>1</sup> scd<sup>1</sup> ras<sup>1</sup> v<sup>1</sup> f<sup>1</sup>* flies to males of a randomly chosen  
145 subset of Drosophila Genetic Reference Panel lines (Mackay *et al.* 2012). When the  
146 adult F1 offspring eclosed, we fixed specimens in 70% ethanol, and then mounted male  
147 prothoracic legs in 70% glycerol and scored them for the presence of ectopic sex combs  
148 on the second tarsal segment, abnormalities in the primary sex comb, and primary sex  
149 comb tooth number. These crosses only examine each wild-type genetic background in  
150 a heterozygous state, and thus it is expected that this will underestimate the actual  
151 degree of background dependence, as recessive effects of alleles in each background  
152 will not be captured.

153 To test for an effect of genetic background on penetrance, we fit a logistic model  
154 testing for the effect of genotype on presence of an ectopic sex comb using glm() in  
155 base R version 3.6.1. We also confirmed those results using glmer() in the lme4  
156 package version 1.1-21.

### 157 *Introgression of $sca^1$* —

158 To generate populations for experimental evolution, we introgressed the  $sca^1$   
159 mutation into FVW, a domesticated lab-maintained population founded from flies  
160 collected from Fenn Valley, MI in 2010. The FVW population was maintained in  
161 population cages with 10 bottles for egg-laying each generation for approximately 10  
162 generations prior to beginning introgressions (Chari *et al.* 2017).

163 To begin the introgression (Supplementary Figure 1A), virgin females of the 5070  
164 progenitor strain (with the genotype  $y^1 sca^1 ras^1 v^1 f^1$ ) were crossed to FVW males; this  
165 stock strain carries visible X-linked genetic markers ( $y^1$  causes yellow body  
166 pigmentation,  $ras^1$  and  $v^1$  affect eye color, and  $f^1$  produces forked bristles). The  
167 heterozygous F1 females were then backcrossed to FVW males. From the F2 offspring,  
168 we selected males showing the  $sca^1$  phenotype, which were thus hemizygous for  $sca^1$ ,  
169 but with phenotypically wild-type eyes and normal bristles to eliminate the  $ras^1$ ,  $v^1$ , and  
170  $f^1$  mutations, which are all located to the right of  $sca^1$  on the X chromosome. We then  
171 crossed these males to virgin FVW females, to obtain female offspring heterozygous for  
172  $sca^1$  in a partial FVW background. We then crossed these females to FVW males, and  
173 selected males with ectopic sex combs, but not yellow bodies, to eliminate the  $y^1$   
174 mutation to the left of  $sca^1$ . Each male from these crosses thus carries an independently  
175 derived X chromosome with  $sca^1$  in a random FVW background.



176 We obtained eight such males and crossed them to FVW females. From these  
177 crosses, we obtained virgin females heterozygous for *scd<sup>1</sup>* in an FVW background. The  
178 first of these virgin *scd<sup>1</sup>/scd<sup>+</sup>* females to emerge were crossed with FVW males to obtain  
179 more *scd<sup>1</sup>* males with a mostly FVW background. The later-emerging *scd<sup>1</sup>/scd<sup>+</sup>* females  
180 were kept isolated at cooler temperatures (18°C) until the *scd<sup>1</sup>* males from the previous  
181 cross emerged. We then crossed the *scd<sup>1</sup>/scd<sup>+</sup>* females to the *scd<sup>1</sup>* males. Finally, we  
182 set up sib matings among the offspring of these crosses, using only males hemizygous  
183 for *scd<sup>1</sup>* (showing a sex comb phenotype) and females of unknown genotype (either  
184 *scd<sup>1</sup>/scd<sup>+</sup>* or *scd<sup>1</sup>/scd<sup>1</sup>*). Of those crosses, we kept those in which the mother was  
185 inferred to be homozygous for *scd<sup>1</sup>*, in which nearly all male progeny displayed *scd<sup>1</sup>*  
186 phenotypes. This allowed us to establish a homozygous *scd<sup>1</sup>* line with an FVW genetic  
187 background, which we designated as *scd<sup>\*</sup>*. *scd<sup>\*</sup>* carried at least four independently  
188 derived X chromosomes with *scd<sup>1</sup>* in an FVW background (Supplementary Figure 1A).

189 To introduce further genetic diversity (from the FVW population) into *scd<sup>\*</sup>*, *scd<sup>\*</sup>*  
190 males were crossed to wild-type FVW females to obtain heterozygous *scd<sup>1</sup>* females with  
191 additional genetic material from the FVW background. These females were then  
192 backcrossed to FVW males. Five replicate backcrosses were set up in culture bottles,  
193 each with 25-30 FVW males and 25-30 females, heterozygous for *scd<sup>1</sup>* and for alleles  
194 from the FVW background. We then selected males with the *scd<sup>1</sup>* phenotype, and  
195 backcrossed them to virgin *scd<sup>\*</sup>* females, in six replicate bottles each containing 20-25  
196 males and 20-25 females, to maintain *scd<sup>1</sup>* while introducing additional genetic diversity  
197 from the FVW population. This whole cycle was then repeated once to establish the  
198 *scd<sup>\*\*</sup>* base population for experimental evolution (Supplementary Figure 1B).

199 *Fitness effects of  $scd^1$* —

200           To test whether the  $scd^1$  allele was deleterious, we tracked changes in the  
201 frequency of the  $scd^1$  phenotype in polymorphic populations with the  $scd^1$  allele at 0.7  
202 initial frequency. We initiated four replicate populations, each consisting of 70  $scd^{**}$   
203 males, 70  $scd^{**}$  females, 30 FVW males, and 30 FVW females. Populations were  
204 placed in population cages with four culture bottles for mating and oviposition for five  
205 days, after which the flies were discarded and the bottles transferred to fresh cages at  
206 24°C. After adult flies began emerging, they were allowed to mate for three to four days.  
207 The old bottles were then removed, and fresh bottles were placed in the cage for egg  
208 laying. After two days of egg laying, the flies were discarded and the bottles moved to  
209 fresh cages. This cycle was repeated for a total of nine generations.

210           For each of the first five generations, and at generation nine, we scored male sex  
211 comb phenotypes. 50 males were picked randomly, and the first prothoracic legs from  
212 each male were mounted on glass slides in 70% glycerol/PBS to check for the presence  
213 of an ectopic second sex comb and other abnormalities. While this does not give an  
214 exact measurement of the frequency of the  $scd^1$  allele because of this allele's  
215 incomplete penetrance (though penetrance is almost complete in the FVW background;  
216 see below), it should provide a reasonable proxy. Even though reductions in the  
217 frequency of the mutant phenotype could also be driven by selection for suppressor  
218 alleles, this should still give an indication of whether or not the  $scd^1$  phenotype is  
219 deleterious.

220           To test whether there was evidence that the  $scd^1$  allele was deleterious (and  
221 decreased in frequency) we fit a logistic regression tracking number of  $scd^1$  and wild-

222 type males each generation. As the frequency of *scd*<sup>1</sup> at generation 0 was set at exactly  
223 0.7, we utilized an offset and suppressed the model intercept. Additionally we checked  
224 the results of this model using a logistic mixed model allowing for a variation in the slope  
225 of the response by replicate lineage. Analyses were conducted in R using `glm()` and  
226 `glmer()` from the `lme4` package.

### 227 *Experimental evolution—*

228 To test whether sexual selection influences the rate of compensatory adaptation,  
229 we set up two treatments. In the low sexual selection (LSS) treatment, we removed  
230 sexual selection by enforcing monogamous mating. Each generation, we set up 100  
231 vials, each containing one male and one virgin female. After a three-day interaction  
232 period, we anesthetized the flies using CO<sub>2</sub>, discarded males, and placed the females in  
233 a population cage with four bottles containing culture media for egg laying. After four  
234 days, the bottles were removed and incubated at 24°C. When adult flies began eclosing,  
235 we selected virgins for the next generation. Thus, while this treatment did preclude mate  
236 choice, it still allowed for fecundity and viability selection (Arbuthnott and Rundle 2012).

237 In the high sexual selection (HSS) treatment, we followed a similar protocol  
238 except allowed the opportunity for sexual selection. Each generation, 100 males and  
239 100 virgin females were allowed to interact in a population cage, along with an open  
240 culture bottle for food and moisture. After the three-day interaction period, we placed the  
241 cage in a refrigerator to knock the flies out, and then we sorted males and females.  
242 Males were discarded, and females were placed in fresh cages with four culture bottles  
243 for a four-day egg-laying period. After egg laying, females were discarded, and the

244 bottles were placed in an environmental chamber at 24°C until adults began emerging,  
245 at which point we collected virgins for the next generation.

246         Additionally, we also set up a treatment with low levels of genetic variation (LV)  
247 to test whether compensatory adaptation is limited when segregating genetic variation is  
248 diminished; in other words, testing whether the mutational target size of the  
249 compensatory response was large enough that *de novo* mutations could contribute in  
250 the time frame of the experimental evolution regime. In this treatment, each population  
251 was established from the offspring of a single-pair mating between a randomly chosen  
252 virgin *scd<sup>\*\*</sup>* female and a randomly chosen *scd<sup>\*\*</sup>* male. These populations were kept  
253 under the same regime as the HSS treatment.

254         Finally, we set up a wild-type control (WTC) treatment using wild-type FVW flies.  
255 WTC populations were also maintained under the same regime as the HSS treatment.  
256 These provide a control for lab domestication and unknown aspects of the experimental  
257 protocol.

258         All populations were initiated using randomly selected *scd<sup>\*\*</sup>* flies (see above),  
259 except for the LV treatments as described. We set up three replicate populations of  
260 each treatment except for WTC, in which we performed two replicates. Experimental  
261 evolution was conducted for a total of 24 generations. We assayed male sex comb  
262 phenotypes as described earlier at generations 1, 7, 13, 19, and 24, using 30 randomly  
263 selected males from each population at each time point.

264         To test how male sex comb traits changed over the course of experimental  
265 evolution, we fit generalized linear mixed models using the glmmTMB v0.2.3 (Hadfield  
266 2010) and lme4 v1.1-21 (Bates *et al.* 2015) packages in R (v3.6.1). For sex comb tooth

267 number for both primary and ectopic/secondary combs, we assumed a Poisson  
268 distribution and used a log link function. The model included generation, treatment, and  
269 their interaction as fixed effects; we also included individual fly, and in some cases  
270 replicate population nested within treatment, as random effects (some models failed to  
271 converge when replicate nested within treatment was included as a random effect). We  
272 also tested for lineage specific zero-inflation in the data, but found no evidence for this,  
273 so excluded this to reduce number of parameters. To test whether the frequency of  
274 defects in the primary sex comb changed over time, we fit a mixed logistic model (sex  
275 comb defects present/absent), again with generation, treatment, and their interaction as  
276 fixed effects, and replicate nested within treatment, as well as individual fly, as random  
277 effects. Power simulations were performed using simr v1.0.5 (Green and MacLeod  
278 2016).

279

## 280 **Results**

### 281 *Mapping $sca^1$* —

282       Though we could not map  $sca^1$  to a specific gene, we were able to further narrow  
283 down its location to an ~85-kb (cytological region 8F8-9A1) region on the X  
284 chromosome through duplication mapping (Table 1, Figure 2). This region contains only  
285 two complete annotated protein-coding genes, *btd* and *Sp1* (both of which influence  
286 aspects of leg development and morphogenesis), and three annotated long non-coding  
287 RNAs, CR42657, CR44016, and CR53498. Interestingly, the two parent strains carrying  
288 the duplications that rescued  $sca^1$  had smaller than average sex combs in the absence  
289 of the  $sca^1$  mutation (Table 1), similar to a past study involving this mutation (Randsholt

290 and Santamaria 2008), suggesting that the *scd* gene product is a suppressor of sex  
291 comb development.

292 *Influence of genetic background on penetrance and expressivity—*

293         When females of the original *scd*<sup>1</sup> stock strain were crossed to males of various  
294 wild-type strains to generate males that were hemizygous for *scd*<sup>1</sup> and heterozygous for  
295 different genetic backgrounds, the penetrance and expressivity of *scd*<sup>1</sup> varied widely  
296 (Figure 3) demonstrating segregating variation for them. A logistic model using  
297 penetrance (presence/absence of ectopic sex comb) as the response variable with the  
298 genetic background as a fixed effect was a significantly better fit than a null model not  
299 accounting for genetic background ( $\chi^2 = 127.6$ ,  $df = 18$ ,  $p = 5.3 \times 10^{-19}$ ), and when we fit  
300 a model including genetic background as a random effect, there was substantial among-  
301 strain variance ( $\sigma^2 = 4.19$  on the link scale). Similarly, a model with number of ectopic  
302 sex comb teeth as the response variable (expressivity) and genetic background as a  
303 fixed effect was a significantly better fit than the null model ( $\chi^2 = 259.0$ ,  $df = 18$ ,  $p < 1.0 \times$   
304  $10^{-10}$ ). The progenitor *scd*<sup>1</sup> strain from the Bloomington stock center had the lowest  
305 penetrance (frequency of flies exhibiting an ectopic sex comb on the second tarsal  
306 segment) and among the lowest expressivity (number of teeth in the ectopic sex comb).  
307 Some of the other wild-type genetic backgrounds, even in a heterozygous state,  
308 resulted in nearly complete penetrance for *scd*<sup>1</sup>, including the outbred population (FVW)  
309 used for experimental evolution (described below). Interestingly, the FVW outbred  
310 population only showed intermediate levels of expressivity of the mutant phenotype,  
311 consistent with segregating variation in this population. Overall this result suggests  
312 genetic background has a strong impact on the phenotypic expression on *scd*<sup>1</sup>. It also

313 suggests that the partial penetrance initially observed in the progenitor stock (strain  
314 5070) may reflect the accumulation of suppressor/compensatory mutations in the base  
315 stock center strain itself. These results suggest that a compensatory response could  
316 potentially be due to the accumulation of segregating suppressor alleles.

317 *Fitness effects of  $scd^1$* —

318 The frequency of male flies exhibiting the  $scd^1$  phenotype (in an FVW genetic  
319 background) decreased across five generations of experimental evolution in populations  
320 polymorphic for  $scd^1$  (Figure 4). With a starting allele frequency of 0.7 the frequency  
321 decreased to an average frequency of 0.4 (across the multiple replicates) in males by  
322 generation 9. To test this more rigorously, we fit a logistic model with an offset (starting  
323 frequency of  $scd^1 = 0.7$ ), and the effect of generation was significant (effect = -0.197 on  
324 logit link scale, s.e. = 0.049,  $p = 5.1 \times 10^{-5}$ ). These results are consistent with the  
325 mutation having moderate deleterious effects.

326 *Experimental evolution*—

327 In the populations carrying the  $scd^1$  allele, defects such as gaps in the sex comb  
328 were observed occasionally, and at significantly higher frequencies in the High Sexual  
329 Selection (HSS) populations, and marginally significant frequencies in the Low Sexual  
330 Selection (LSS) populations, than in the wild-type populations. The frequency of these  
331 gaps appeared to decrease in the HSS populations across the 24 generations of the  
332 experiment, although the interaction between generation and treatment was not  
333 significant (Figure 5B; Table 2). In addition, the ectopic sex combs induced by the  $scd^1$   
334 mutation became smaller on average in both the HSS and LSS treatments (Figure 5C;  
335 Table 3), losing on average ~0.5 teeth across the 24 generations of experimental

336 evolution. This is consistent with some of the compensatory response being the result of  
337 the increase in frequency of naturally occurring suppressor alleles. Again, we saw no  
338 evidence for differences in rate of compensation between the HSS and LSS treatments,  
339 with the magnitude of the interaction term (change in slope relative to LSS) being  $\sim 1/10$   
340 the magnitude of the effect of generation. This suggests the additional compensatory  
341 effects of sexual selection were relatively weak in this experimental system. Using a  
342 power analysis, we confirmed that the power to detect such an effect would be very  
343 small (Supplementary Figure 2) unless we used a large number of independent  
344 replicate lineages ( $\sim 30$  per treatment), although the power to detect such an effect of  
345 such a magnitude (assuming it was real) would be approximately 80% with three  
346 replicates if the response continued for 40 generations of experimental evolution  
347 (Supplementary Figure 3).

348 For the Low genetic Variation (LV) treatment no significant change over time was  
349 observed, as expected (generation effect = 0.0017, SD = 0.0044,  $p = 0.70$ ). No  
350 significant changes were observed in the primary sex comb tooth number across 24  
351 generations in any of the experimental treatments (Figure 5A; Table 4).

352

## 353 **Discussion**

354 Some, but not all, previous work has found that sexual selection may facilitate  
355 populations in purging deleterious mutations (Radwan 2004; Hollis *et al.* 2009;  
356 Jarzebowska and Radwan 2010) or accelerating rate of adaptation (Jacomb *et al.* 2016;  
357 Parrett and Knell 2018). Few studies, however, have addressed whether sexual  
358 selection may facilitate compensatory adaptation, where populations evolve traits to



359 compensate for the fitness costs of deleterious mutations. While compensatory  
360 adaptation itself is well documented in other systems (Reynolds 2000; Maisnier-Patin *et*  
361 *al.* 2002; Estes *et al.* 2011; Chandler *et al.* 2012; Comas *et al.* 2012; Chari *et al.* 2017),  
362 in this experiment, we found no effect of the sexual selection regime on the rate of  
363 compensatory adaptation (at least with respect to the mutation's sex comb phenotypes).  
364 This is perhaps surprising, because we found clear evidence of standing genetic  
365 variation modulating the expression of this mutation, so genetic variation does not  
366 appear to be a limiting factor here. Moreover, our experiments show that the *scd*<sup>1</sup>  
367 mutation is deleterious (Figure 4), and given the importance of the *Drosophila* sex comb  
368 for male mating success (Ng and Kopp 2008), we expected that the fitness costs of this  
369 mutation would involve male sexual fitness. Thus, we predicted that the costs of this  
370 mutation would be higher in the HSS treatment, in which there was a high opportunity  
371 for female mate choice, than in the LSS treatment, with reduced opportunity for sexual  
372 selection. It is possible that this mutation has effects on other aspects of fitness in males  
373 or females (viability, fecundity), but unfortunately our experiments did not directly  
374 measure specific fitness components. Even so, theoretical work predicts that sexual  
375 selection should act in concert with natural selection because of condition dependence  
376 (Whitlock and Agrawal 2009); that is, mutations that reduce nonsexual fitness should  
377 also reduce mating success, since sexual displays are often indicators of overall  
378 condition. While some work has supported this prediction, our findings add to a growing  
379 body of work suggesting that this is not always the case (Hollis and Houle 2011; Plesnar  
380 *et al.* 2011; Arbuthnott and Rundle 2012, 2014; Cabral and Holland 2014; Power and  
381 Holman 2015; Chenoweth *et al.* 2015). It is possible that the relatively minor degree of

382 phenotypic suppression observed here made it difficult to detect differences between  
383 treatments. In fact, it is interesting that the largest difference between the HSS and LSS  
384 treatments appears to be the decline in primary sex comb defects in the HSS population  
385 (Figure 5), though this difference is non-significant, given that we might expect primary  
386 sex comb defects to be more deleterious than the presence of an “extra” sex comb.

387       Even though sexual selection did not impact the rate of compensatory evolution,  
388 we did observe evidence of weak compensatory adaptation via phenotypic suppression  
389 of the *scd*<sup>1</sup> mutation in both the HSS and LSS treatments. On average, the ectopic sex  
390 combs lost about half a tooth (starting with a mean of ~ 3.5 teeth) over the course of 24  
391 generations in these populations; in other words, the expressivity of the mutation  
392 declined slightly. One possible explanation for the similar response in both the high and  
393 low sexual selection treatment is simply that the compensatory response (in terms of  
394 phenotypic suppression) was sufficiently weak that any subtle difference between these  
395 treatments would be difficult to detect given our design. However, the power analyses  
396 (Supplementary Figures 2 and 3) suggest that if an effect of this magnitude were real, it  
397 is sufficiently small that it would require ~25 replicate lineages of each treatment to  
398 detect or a doubling of the number of generations of experimental evolution.

399       As expected, we did not observe any significant trend in the LV treatment, in  
400 which populations experienced genetic bottlenecks prior to beginning the experiment  
401 (LV populations were treated the same way as HSS populations). Combined with the  
402 observation that genetic background has strong influences on the penetrance and  
403 expressivity of this mutation (Figure 3), this suggests that compensatory adaptation by  
404 phenotypic suppression relies heavily on the presence of standing genetic variation,

405 rather than rapid accumulation of new mutations. An interesting side note is that the  
406 initial strain (obtained from the Drosophila stock center) carrying *scd*<sup>1</sup> has among the  
407 lowest penetrance/expressivity for this mutation of all the genetic backgrounds that we  
408 tested. This may suggest that the stock strain has already undergone compensatory  
409 adaptation, and that alleles suppressing the phenotypic expression of *scd*<sup>1</sup> had become  
410 fixed throughout the maintenance of this stock (which were subsequently removed  
411 when we outcrossed the mutation), though unfortunately we do not have any data on  
412 how long the *scd*<sup>1</sup> stock strain has been maintained.

413         While we were unable to map *scd*<sup>1</sup> to a specific gene, we were able to localize it  
414 to an ~85 kb region containing only a few candidates. The only protein-coding candidate  
415 genes in this region, *Sp1* and *btd*, both have known roles in leg development (Estella  
416 and Mann 2010), but are not specifically known to influence sex comb development.  
417 There are also three long non-coding RNAs in this region (CR42657, CR44016, and  
418 CR43498). Interestingly, all three of these RNAs show evidence of male-specific  
419 expression in modENCODE RNA-seq data available on FlyBase (Graveley *et al.* 2011;  
420 Brown *et al.* 2014). However, CR44016 shows expression only at very low levels and  
421 only in adult males, not pupae or larvae, suggesting it is unlikely to be involved in the  
422 development of sex combs. CR42657 and CR43498 both show expression in pupae  
423 and/or larvae, as well as adult males (but not adult females); however, these RNAs  
424 seem to be expressed in the testis and accessory gland and not other tissues (though  
425 expression in legs specifically was not assessed in the modENCODE dataset). This  
426 suggests that these male-specific reproductive tissues may be driving these sex-specific

427 expression patterns, not a role in sex comb development. Further work is necessary to  
428 identify the molecular nature of *scd*<sup>1</sup>.

429         There are a number of important limitations to point out about our study. First,  
430 much of the focus was on compensation by suppression of the phenotypic effects of the  
431 *scd*<sup>1</sup> mutation on the sex combs directly. While we observed similar levels of phenotypic  
432 compensation with both our high and low sexual selection treatments (LSS and HSS), it  
433 is possible that compensatory evolution differed with respect to the fitness components  
434 (viability, fecundity, and sexual/mating components), which were not evaluated. Thus  
435 we limit our interpretation to the effects on morphological compensation/suppression,  
436 recognizing that we cannot rule out differential patterns of compensatory response for  
437 fitness *per se*. Indeed, this pattern has been observed previously (Pischedda and  
438 Chippindale 2005; Chari *et al.* 2017). Additionally, this experiment was performed over a  
439 relatively short time period (25 generations); if we continued the experiment over a  
440 longer period, subtle differences in the rate of morphological compensation may have  
441 become apparent (Supplementary Figure 3).

442         In summary, we found evidence of moderate compensatory adaptation to a  
443 deleterious mutation by selection for modifier alleles that suppress the mutation's  
444 phenotypic effects. However, while compensatory adaptation did depend on the  
445 presence of standing genetic variation, it did not depend on the opportunity for sexual  
446 selection, in spite of the affected phenotype's known role in mating. This adds to a  
447 growing body of studies suggesting that sexual selection does not always enhance  
448 natural selection. Future work should tease apart when and why sexual and natural

449 selection act in concert and when they are likely to operate differently (Martínez-Ruiz  
450 and Knell 2017).

451

## 452 **Acknowledgments**

453 We thank Shelby Hemker and Cody Porter for assistance in data collection and fly  
454 maintenance, as well as the editor and two anonymous reviewers for their feedback on  
455 earlier versions of this manuscript. The BEACON Center for the Study of Evolution in  
456 Action (NSF DBI-0939454) provided support for this work. ID was supported by funds  
457 from NSERC (Canada) Discovery and Discovery Accelerator awards.

458 **Figure Legends**

459 **Figure 1.** (A) Wild-type *Drosophila* leg showing a normal male sex comb (black arrow).

460 (B) *scd*<sup>1</sup> leg showing the normal primary sex comb (black arrow) as well as a smaller  
461 ectopic sex comb on the second tarsal segment (white arrow).

462 **Figure 2.** Duplication mapping of *scd*<sup>1</sup>. Purple bars represent duplications that rescued  
463 the *scd*<sup>1</sup> mutant phenotype; pink bars represent duplications that failed to rescue *scd*<sup>1</sup>.

464 (A) Entire region of the X chromosome in which duplications were tested. (B) Close-up  
465 of the putative *scd*<sup>1</sup>-containing region (red box). Because the duplication carried by  
466 strain 30333 is sufficient to rescue the *scd*<sup>1</sup> phenotype, we hypothesize that the *scd*  
467 gene must lie entirely within this region; at the same time, the neighboring duplications  
468 (30522 and 30334) did not rescue the *scd*<sup>1</sup> phenotype, so *scd* must lie at least partially  
469 outside of these regions.

470 **Figure 3.** (A) Penetrance and (B) expressivity of the *scd*<sup>1</sup> mutation varies among  
471 different wild type genetic backgrounds. In these experiments, stock *scd*<sup>1</sup> females were  
472 crossed to males of different wild-type strains, and phenotypes were scored in F1 males  
473 (which were hemizygous for *scd*<sup>1</sup> and heterozygous for a different wild genetic  
474 background). Penetrance was measured as the proportion of males showing an ectopic  
475 sex comb on the second tarsal segment of the prothoracic leg, while expressivity was  
476 measured as the number of sex comb teeth on the ectopic sex comb. Error bars  
477 indicate 95% confidence intervals.

478 **Figure 4.** The *scd*<sup>1</sup> mutation is deleterious. Average frequency of *scd*<sup>1</sup> over time, across  
479 4 replicate populations, each initialized with 70% *scd*<sup>1</sup> males. Error bars indicate 95%

480 confidence intervals. The shaded region indicates the 95% confidence interval for the  
481 best-fit line, with the starting frequency fixed at 70%.

482 **Figure 5.** Plots of model fits for sex comb traits in experimental evolution populations.

483 (A) Number of teeth in the primary sex comb across 24 generations of experimental  
484 evolution in all experimental treatments. (B) Proportion of male flies with defects in the  
485 primary sex comb in all four treatments. (C) Number of teeth in ectopic/secondary sex  
486 combs in males in the HSS and LSS treatments. Shaded regions on plots indicate 95%  
487 confidence intervals for the predicted values.

488

## 489 **References**

490 Agrawal, A. F., 2001 Sexual selection and the maintenance of sexual reproduction.

491 Nature 411: 692–695.

492 Almbro, M., and L. W. Simmons, 2014 Sexual Selection Can Remove an Experimentally

493 Induced Mutation Load. *Evolution* 68: 295–300.

494 Arbuthnott, D., and H. D. Rundle, 2014 Misalignment of natural and sexual selection

495 among divergently adapted *Drosophila melanogaster* populations. *Animal*

496 Behaviour 87: 45–51.

497 Arbuthnott, D., and H. D. Rundle, 2012 Sexual Selection Is Ineffectual or Inhibits the

498 Purging of Deleterious Mutations in *Drosophila Melanogaster*. *Evolution* 66:

499 2127–2137.

500 Atallah, J., N. H. Liu, P. Dennis, A. Hon, and E. W. Larsen, 2009 Developmental

501 constraints and convergent evolution in *Drosophila* sex comb formation.

502 *Evolution & Development* 11: 205–218.

- 503 Atallah, J., H. Watabe, and A. Kopp, 2012 Many ways to make a novel structure: a new  
504 mode of sex comb development in Drosophilidae. *Evolution & Development* 14:  
505 476–483.
- 506 Bates, D., M. Mächler, B. Bolker, and S. Walker, 2015 Fitting Linear Mixed-Effects  
507 Models Using lme4. *Journal of Statistical Software* 67: 1–48.
- 508 Boube, M., C. Benassayag, L. Seroude, and D. L. Cribbs, 1997 Ras1-Mediated  
509 Modulation of *Drosophila* Homeotic Function in Cell and Segment Identity.  
510 *Genetics* 146: 619–628.
- 511 Brown, J. B., N. Boley, R. Eisman, G. E. May, M. H. Stoiber *et al.*, 2014 Diversity and  
512 dynamics of the *Drosophila* transcriptome. *Nature* 512: 393–399.
- 513 Cabral, L. G., and B. Holland, 2014 Courtship Song Does Not Increase the Rate of  
514 Adaptation to a Thermally Stressful Environment in a *Drosophila melanogaster*  
515 Laboratory Population. *PLOS ONE* 9: e111148.
- 516 Chandler, C. H., G. E. Chadderdon, P. C. Phillips, I. Dworkin, and F. J. Janzen, 2012  
517 Experimental Evolution of the *Caenorhabditis Elegans* Sex Determination  
518 Pathway. *Evolution* 66: 82–93.
- 519 Chandler, C. H., S. Chari, and I. Dworkin, 2013a Does your gene need a background  
520 check? How genetic background impacts the analysis of mutations, genes, and  
521 evolution. *Trends in Genetics* 29: 358–366.
- 522 Chandler, C. H., S. Chari, A. Kowalski, L. Choi, D. Tack *et al.*, 2017 How well do you  
523 know your mutation? Complex effects of genetic background on expressivity,  
524 complementation, and ordering of allelic effects. *PLOS Genetics* 13: e1007075.



- 525 Chandler, C. H., C. Ofria, and I. Dworkin, 2013b Runaway Sexual Selection Leads to  
526 Good Genes. *Evolution* 67: 110–119.
- 527 Chari, S., C. Marier, C. Porter, E. Northrop, A. Belinky *et al.*, 2017 Compensatory  
528 evolution via cryptic genetic variation: Distinct trajectories to phenotypic and  
529 fitness recovery. *bioRxiv* 200725.
- 530 Charlesworth, B., 1978 Model for evolution of Y chromosomes and dosage  
531 compensation. *Proceedings of the National Academy of Sciences* 75: 5618–  
532 5622.
- 533 Chenoweth, S. F., N. C. Appleton, S. L. Allen, and H. D. Rundle, 2015 Genomic  
534 Evidence that Sexual Selection Impedes Adaptation to a Novel Environment.  
535 *Current Biology* 25: 1860–1866.
- 536 Clark, S. C. A., N. P. Sharp, L. Rowe, and A. F. Agrawal, 2012 Relative Effectiveness of  
537 Mating Success and Sperm Competition at Eliminating Deleterious Mutations in  
538 *Drosophila melanogaster* (S. R. Proulx, Ed.). *PLoS ONE* 7: e37351.
- 539 Comas, I., S. Borrell, A. Roetzer, G. Rose, B. Malla *et al.*, 2012 Whole-genome  
540 sequencing of rifampicin-resistant *Mycobacterium tuberculosis* strains identifies  
541 compensatory mutations in RNA polymerase genes. *Nature Genetics* 44: 106–  
542 110.
- 543 Cook, R. K., M. E. Deal, J. A. Deal, R. D. Garton, C. A. Brown *et al.*, 2010 A New  
544 Resource for Characterizing X-Linked Genes in *Drosophila melanogaster*:  
545 Systematic Coverage and Subdivision of the X Chromosome With Nested, Y-  
546 Linked Duplications. *Genetics* 186: 1095–1109.

- 547 Davies, A. G., A. Y. Game, Z. Chen, T. J. Williams, S. Goodall *et al.*, 1996 Scalloped  
548 wings Is the *Lucilia cuprina* Notch Homologue and a Candidate for the Modifier of  
549 Fitness and Asymmetry of Diazinon Resistance. *Genetics* 143: 1321–1337.
- 550 Ellis, E. A., and T. H. Oakley, 2016 High Rates of Species Accumulation in Animals with  
551 Bioluminescent Courtship Displays. *Current Biology* 26: 1916–1921.
- 552 Estella, C., and R. S. Mann, 2010 Non-Redundant Selector and Growth-Promoting  
553 Functions of Two Sister Genes, *buttonhead* and *Sp1*, in *Drosophila* Leg  
554 Development (D. L. Stern, Ed.). *PLoS Genetics* 6: e1001001.
- 555 Estes, S., P. C. Phillips, and D. R. Denver, 2011 Fitness Recovery and Compensatory  
556 Evolution in Natural Mutant Lines of *C. Elegans*. *Evolution* 65: 2335–2344.
- 557 Graveley, B. R., A. N. Brooks, J. W. Carlson, M. O. Duff, J. M. Landolin *et al.*, 2011 The  
558 developmental transcriptome of *Drosophila melanogaster*. *Nature* 471: 473–479.
- 559 Green, P., and C. J. MacLeod, 2016 *simr*: an R package for power analysis of  
560 generalised linear mixed models by simulation. *Methods in Ecology and*  
561 *Evolution* 7: 493–498.
- 562 Grieshop, K., J. Stångberg, I. Martinossi-Alilibert, G. Arnqvist, and D. Berger, 2016  
563 Strong sexual selection in males against a mutation load that reduces offspring  
564 production in seed beetles. *Journal of Evolutionary Biology* 29: 1201–1210.
- 565 Hadfield, J. D., 2010 MCMC Methods for Multi-Response Generalized Linear Mixed  
566 Models: The MCMCglmm R Package. *Journal of Statistical Software* 33: 1–22.
- 567 Hollis, B., J. L. Fierst, and D. Houle, 2009 Sexual Selection Accelerates the Elimination  
568 of a Deleterious Mutant in *Drosophila Melanogaster*. *Evolution* 63: 324–333.

- 569 Hollis, B., and D. Houle, 2011 Populations with elevated mutation load do not benefit  
570 from the operation of sexual selection. *Journal of Evolutionary Biology* 24: 1918–  
571 1926.
- 572 Hou, J., G. Tan, G. R. Fink, B. J. Andrews, and C. Boone, 2019 Complex modifier  
573 landscape underlying genetic background effects. *PNAS* 116: 5045–5054.
- 574 Jacomb, F., J. Marsh, and L. Holman, 2016 Sexual selection expedites the evolution of  
575 pesticide resistance. *Evolution* 70: 2746–2751.
- 576 Jarzebowska, M., and J. Radwan, 2010 Sexual Selection Counteracts Extinction of  
577 Small Populations of the Bulb Mites. *Evolution* 64: 1283–1289.
- 578 Kopp, A., 2011 *Drosophila* sex combs as a model of evolutionary innovations. *Evolution*  
579 & Development 13: 504–522.
- 580 Long, T. A. F., A. F. Agrawal, and L. Rowe, 2012 The Effect of Sexual Selection on  
581 Offspring Fitness Depends on the Nature of Genetic Variation. *Current Biology*  
582 22: 204–208.
- 583 Lumley, A. J., Ł. Michalczyk, J. J. N. Kitson, L. G. Spurgin, C. A. Morrison *et al.*, 2015  
584 Sexual selection protects against extinction. *Nature* 522: 470–473.
- 585 Mackay, T. F. C., S. Richards, E. A. Stone, A. Barbadilla, J. F. Ayroles *et al.*, 2012 The  
586 *Drosophila melanogaster* Genetic Reference Panel. *Nature* 482: 173–178.
- 587 Maisnier-Patin, S., O. G. Berg, L. Liljas, and D. I. Andersson, 2002 Compensatory  
588 adaptation to the deleterious effect of antibiotic resistance in *Salmonella*  
589 typhimurium. *Molecular Microbiology* 46: 355–366.
- 590 Malagón, J. N., A. Ahuja, G. Sivapatham, J. Hung, J. Lee *et al.*, 2014 Evolution of  
591 *Drosophila* sex comb length illustrates the inextricable interplay between

- 592 selection and variation. *Proceedings of the National Academy of Sciences* 111:  
593 E4103–E4109.
- 594 Martínez-Ruiz, C., and R. J. Knell, 2017 Sexual selection can both increase and  
595 decrease extinction probability: reconciling demographic and evolutionary  
596 factors. *Journal of Animal Ecology* 86: 117–127.
- 597 Masta, S. E., and W. P. Maddison, 2002 Sexual selection driving diversification in  
598 jumping spiders. *Proceedings of the National Academy of Sciences* 99: 4442–  
599 4447.
- 600 McGuigan, K., D. Petfield, and M. W. Blows, 2011 Reducing Mutation Load Through  
601 Sexual Selection on Males. *Evolution* 65: 2816–2829.
- 602 McKenzie, J. A., and G. Clarke, 1988 Diazinon Resistance, Fluctuating Asymmetry and  
603 Fitness in the Australian Sheep Blowfly, *Lucilia cuprina*. *Genetics* 120: 213–220.
- 604 Mullis, M. N., T. Matsui, R. Schell, R. Foree, and I. M. Ehrenreich, 2018 The complex  
605 underpinnings of genetic background effects. *Nat Commun* 9: 1–10.
- 606 Ng, C. S., and A. Kopp, 2008 Sex Combs are Important for Male Mating Success in  
607 *Drosophila melanogaster*. *Behav Genet* 38: 195.
- 608 Parrett, J. M., and R. J. Knell, 2018 The effect of sexual selection on adaptation and  
609 extinction under increasing temperatures. *Proceedings of the Royal Society B:*  
610 *Biological Sciences* 285: 20180303.
- 611 Pischedda, A., and A. Chippindale, 2005 Sex, mutation and fitness: asymmetric costs  
612 and routes to recovery through compensatory evolution. *Journal of Evolutionary*  
613 *Biology* 18: 1115–1122.

- 614 Plesnar, A., M. Konior, and J. Radwan, 2011 The role of sexual selection in purging the  
615 genome of induced mutations in the bulb mite. *Evolutionary Ecology Research*  
616 13: 209–216.
- 617 Power, D. J., and L. Holman, 2015 Assessing the alignment of sexual and natural  
618 selection using radiomutagenized seed beetles. *Journal of Evolutionary Biology*  
619 28: 1039–1048.
- 620 Radwan, J., 2004 Effectiveness of sexual selection in removing mutations induced with  
621 ionizing radiation. *Ecology Letters* 7: 1149–1154.
- 622 Randsholt, N. B., and P. Santamaria, 2008 How *Drosophila* change their combs: the  
623 Hox gene *Sex combs reduced* and sex comb variation among *Sophophora*  
624 species. *Evolution & Development* 10: 121–133.
- 625 Reynolds, M. G., 2000 Compensatory Evolution in Rifampin-Resistant *Escherichia coli*.  
626 *Genetics* 156: 1471–1481.
- 627 Rowe, L., and D. Houle, 1996 The lek paradox and the capture of genetic variance by  
628 condition dependent traits. *Proceedings of the Royal Society of London. Series*  
629 *B: Biological Sciences* 263: 1415–1421.
- 630 Santamaria, P., and N. B. Randsholt, 1995 Characterization of a region of the X  
631 chromosome of *Drosophila* including multi sex combs (*mxc*), a Polycomb group  
632 gene which also functions as a tumour suppressor. *Molec. Gen. Genet.* 246:  
633 282–290.
- 634 Sharp, N. P., and A. F. Agrawal, 2008 Mating Density and the Strength of Sexual  
635 Selection Against Deleterious Alleles in *Drosophila Melanogaster*. *Evolution* 62:  
636 857–867.

- 637 Venken, K. J. T., E. Popodi, S. L. Holtzman, K. L. Schulze, S. Park *et al.*, 2010 A  
638           Molecularly Defined Duplication Set for the X Chromosome of *Drosophila*  
639           *melanogaster*. *Genetics* 186: 1111–1125.
- 640 Whitlock, M. C., and A. F. Agrawal, 2009 Purging the Genome with Sexual Selection:  
641           Reducing Mutation Load Through Selection on Males. *Evolution* 63: 569–582.  
642

1 **Table 1.** Duplication mapping of the *scd*<sup>1</sup> allele. Homozygous female *scd*<sup>1</sup> flies were crossed to males carrying a segment  
2 of the X chromosome duplicated onto either the Y chromosome or chromosome III. Assuming *scd*<sup>1</sup> is a recessive loss-of-  
3 function allele, if the male progeny of these crosses show a mutant phenotype, then the duplication does not rescue *scd*<sup>1</sup>  
4 and *scd* must lie at least partially outside the duplication. If none of the male offspring show a mutant phenotype, then  
5 *scd*<sup>1</sup> is rescued and *scd* lies within the duplication.

| Duplication Stock # | Symbol        | Duplicated region                                                                 | Rescues <i>scd</i> <sup>1</sup> ?                                                                                               |
|---------------------|---------------|-----------------------------------------------------------------------------------|---------------------------------------------------------------------------------------------------------------------------------|
| 29759               | Dp(1;Y)BSC35  | X:8192725-8271204;X:9030055;Y & X:1;X:493529;Y                                    | No; replicated 2x                                                                                                               |
| 30522               | Dp(1;Y)BSC146 | X:8714331-8897281;X:9686653;Y & X:1;X:493529;Y                                    | No; replicated 2x                                                                                                               |
| 29782               | Dp(1;Y)BSC58  | X:9355691-9500067;X:10744934;Y & X:1;X:493529;Y                                   | Yes; replicated 2x;<br>note: duplication on its own has reduced sex comb teeth in primary comb (mean=8.2, sd=1.3, SE=0.4, N=11) |
| 29783               | Dp(1;Y)BSC59  | X:10085520-10218380;X:10744934;Y & X:1;X:493529;Y                                 | No                                                                                                                              |
| 29784               | Dp(1;Y)BSC60  | X:10331363-10385547;X:10744934;Y & X:21572099-22456281;h28-h29;Y & X:1;X:493529;Y | No                                                                                                                              |
| 29786               | Dp(1;Y)BSC62  | X:10460679-10601454;X:10744934;Y & X:1;X:493529;Y                                 | No                                                                                                                              |
| 29788               | Dp(1;Y)BSC64  | X:10601454-10738950;X:10744934;Y & X:1;X:493529;Y & X:21204834-21318903;h28-h29;Y | No                                                                                                                              |
| 30333               | Dp(1;3)DC212  | X:9677341;X:9784700;3L:6442676 (r6, Dp)                                           | Yes; note: duplication on its own has small sex combs for primary comb (3-5 teeth)                                              |
| 30334               | Dp(1;3)DC213  | X:9762229;X:9807047;3L:6442676 (r6, Dp)                                           | No                                                                                                                              |

6

7

8 **Table 2.** Effect estimates for logistic mixed model for gaps in the primary sex comb as response variable; generation,  
 9 treatment, and their interaction as fixed effects; and replicate nested within treatment, and individual fly as random effects.

|                            | Estimate | Standard Error | <i>P</i>               |
|----------------------------|----------|----------------|------------------------|
| Intercept                  | -4.96    | 1.2            | 4.6 x 10 <sup>-5</sup> |
| generation                 | 0.040    | 0.07           | 0.57                   |
| treatment-HSS              | 3.0      | 1.3            | 0.017                  |
| treatment-LSS              | 2.3      | 1.3            | 0.071                  |
| treatment-LV               | 1.3      | 1.4            | 0.36                   |
| generation x treatment-HSS | -0.094   | 0.075          | 0.21                   |
| generation x treatment-LSS | -0.046   | 0.075          | 0.54                   |
| generation x treatment-LV  | -0.038   | 0.081          | 0.64                   |

10

11



12 **Table 3.** Effect estimates for generalized linear model (poisson) using number of teeth in the ectopic/secondary sex comb  
13 as response variable; generation, treatment, and their interaction as fixed effects; and replicate nested within treatment,  
14 and individual fly as random effects. This model included only the HSS and LSS populations; WTC populations were  
15 excluded because they did not display ectopic sex combs, and because the purpose of this model was to test for a  
16 difference between the HSS and LSS treatments specifically, we considered the LV treatment on its own separately.

|                            | Estimate              | Standard Error       | <i>P</i>                |
|----------------------------|-----------------------|----------------------|-------------------------|
| Intercept                  | 1.38                  | 0.091                | $< 2.0 \times 10^{-16}$ |
| generation                 | $-7.6 \times 10^{-3}$ | $3.9 \times 10^{-3}$ | 0.049                   |
| treatment-LSS              | -0.12                 | 0.13                 | 0.36                    |
| generation x treatment-LSS | $-1.5 \times 10^{-3}$ | $5.6 \times 10^{-3}$ | 0.79                    |

17

18

19 **Table 4.** Effect estimates for generalized linear mixed model for primary sex comb tooth number as response variable;  
 20 generation, treatment, and their interaction as fixed effects; and individual fly as a random effect (models including  
 21 replicate population nested within treatment failed to converge).

|                            | Estimate             | Standard Error       | <i>P</i>              |
|----------------------------|----------------------|----------------------|-----------------------|
| Intercept                  | 2.41                 | 0.035                | $< 2 \times 10^{-16}$ |
| generation                 | $4.4 \times 10^{-4}$ | $2.2 \times 10^{-3}$ | 0.85                  |
| treatment-HSS              | $4.2 \times 10^{-4}$ | 0.046                | 0.99                  |
| treatment-LSS              | 0.017                | 0.045                | 0.71                  |
| treatment-LV               | $6.9 \times 10^{-3}$ | 0.047                | 0.88                  |
| generation x treatment-HSS | $5.2 \times 10^{-4}$ | $2.9 \times 10^{-3}$ | 0.86                  |
| generation x treatment-LSS | $1.3 \times 10^{-3}$ | $2.9 \times 10^{-3}$ | 0.66                  |
| generation x treatment-LV  | $1.4 \times 10^{-3}$ | $3.0 \times 10^{-3}$ | 0.64                  |

22

23

**A**

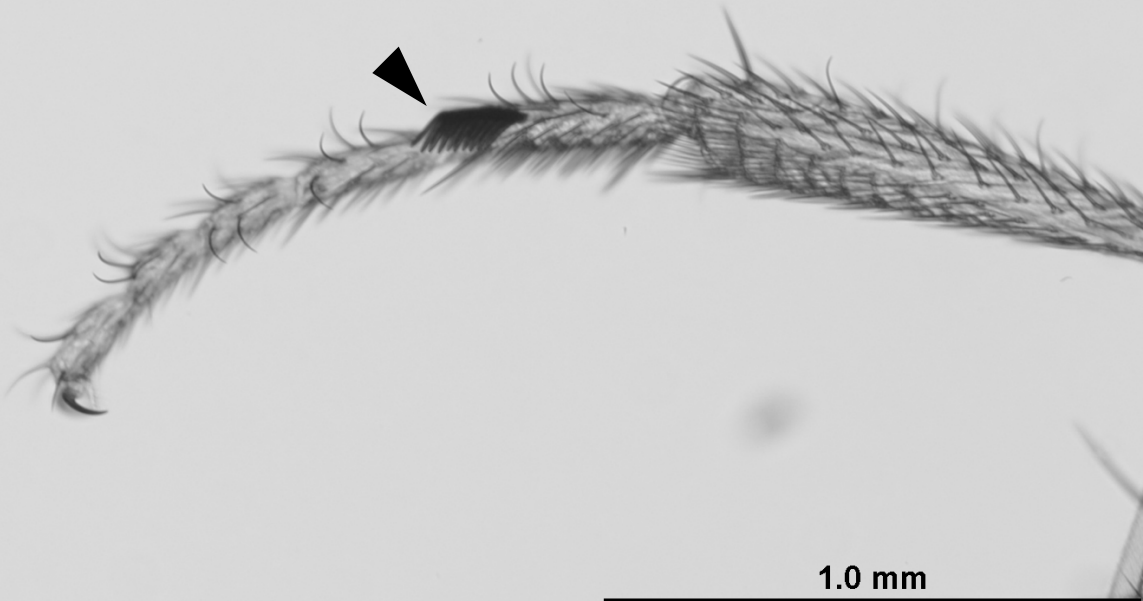

**B**

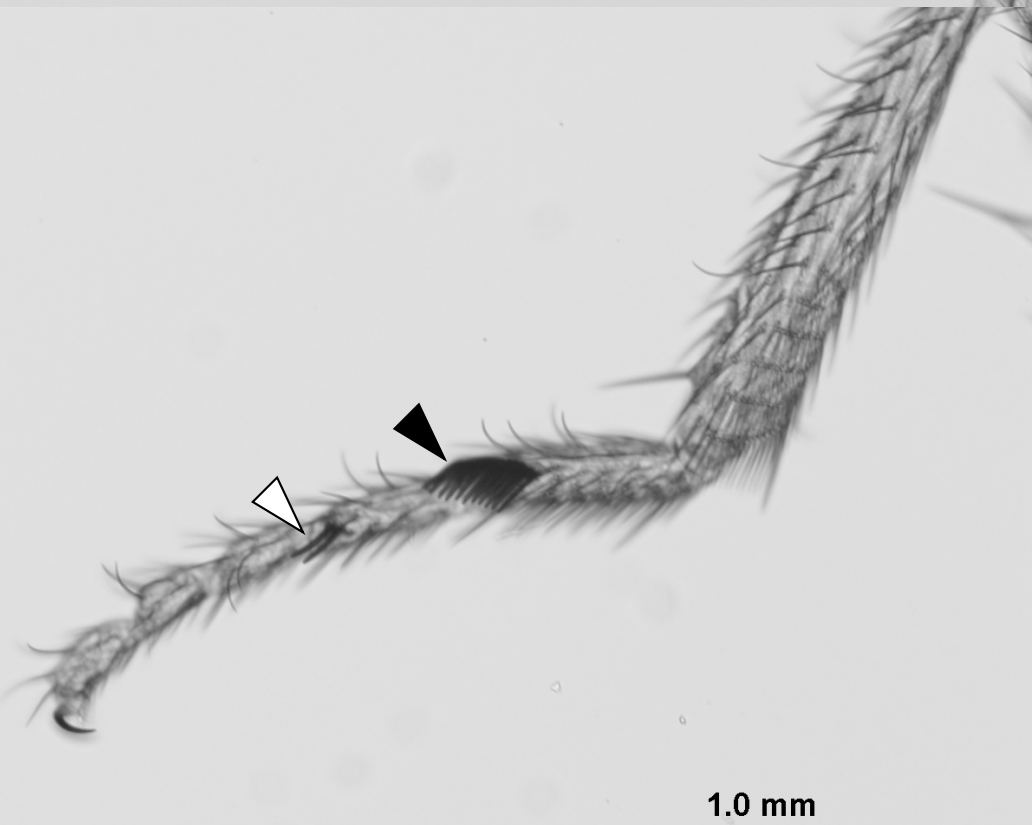

**A**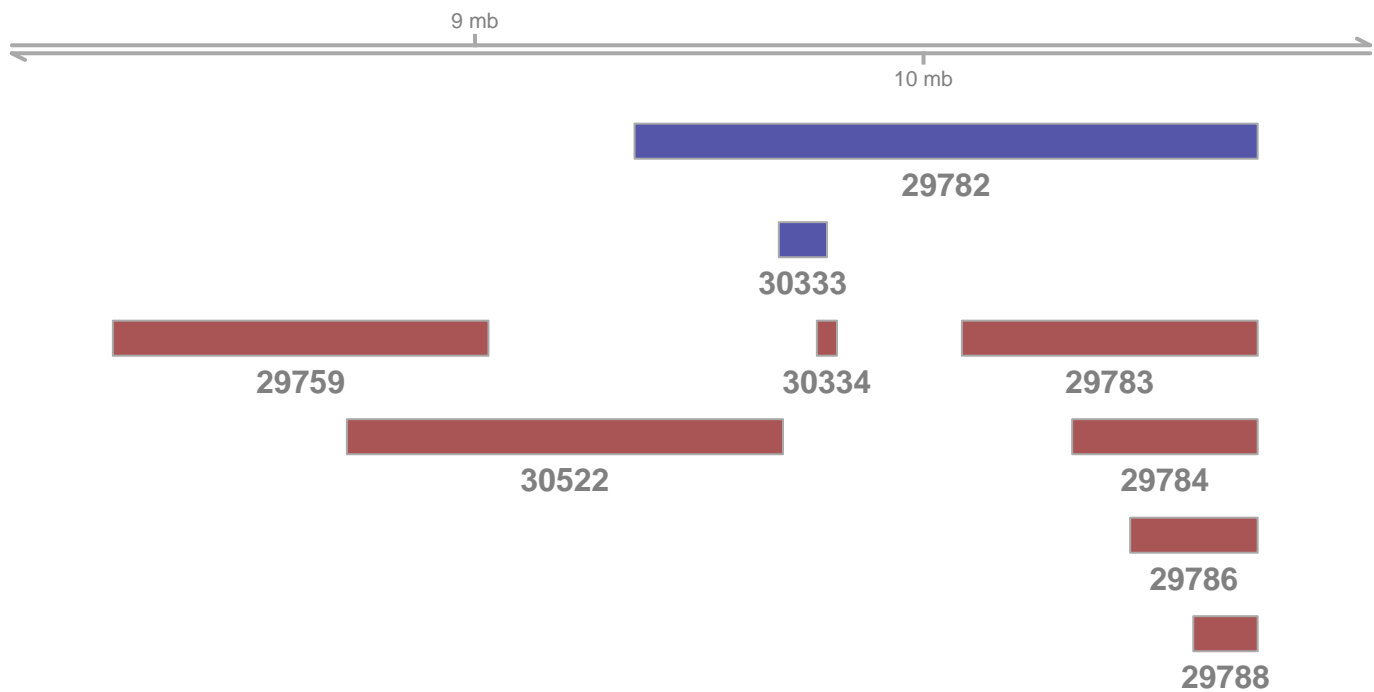**B**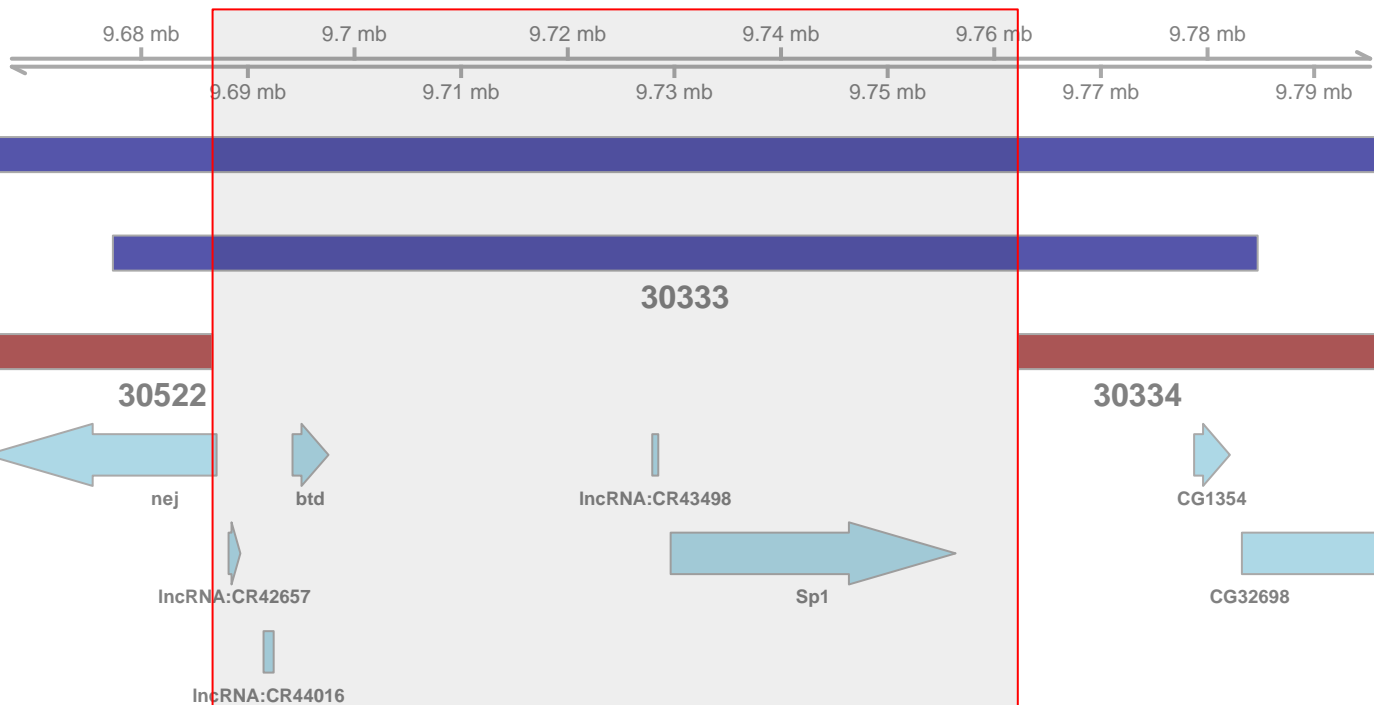

$scd^1$  penetrance

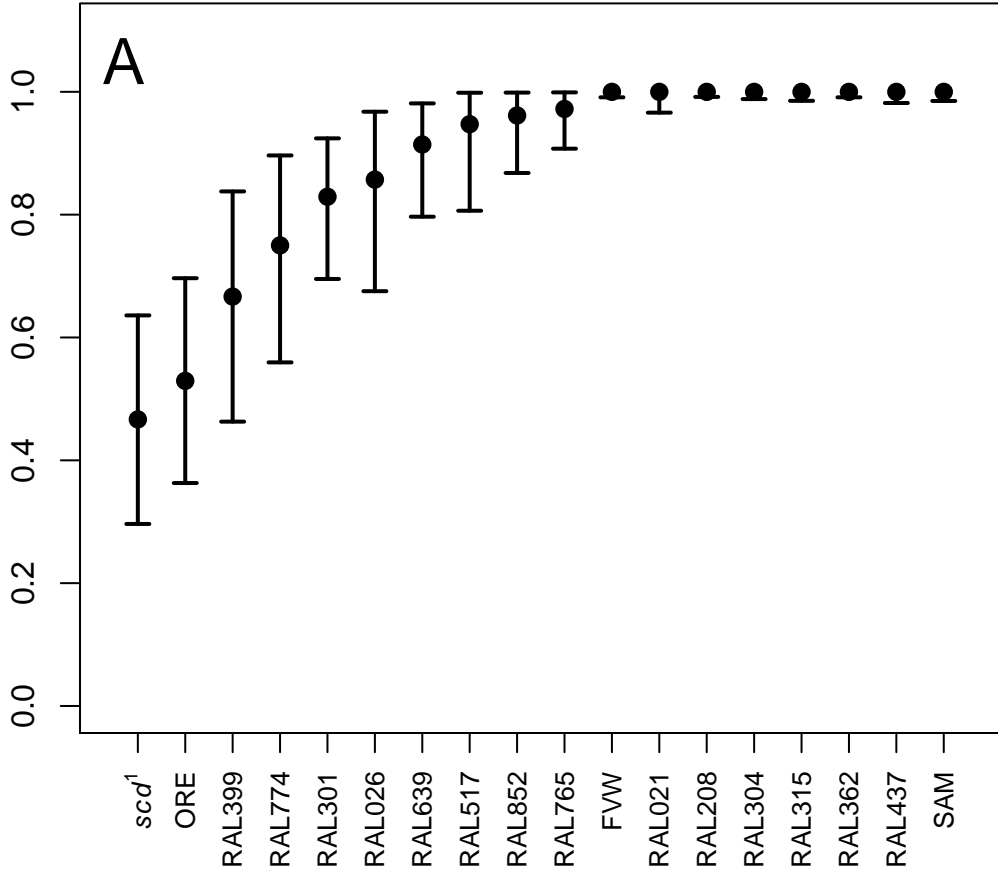

$scd^1$  expressivity

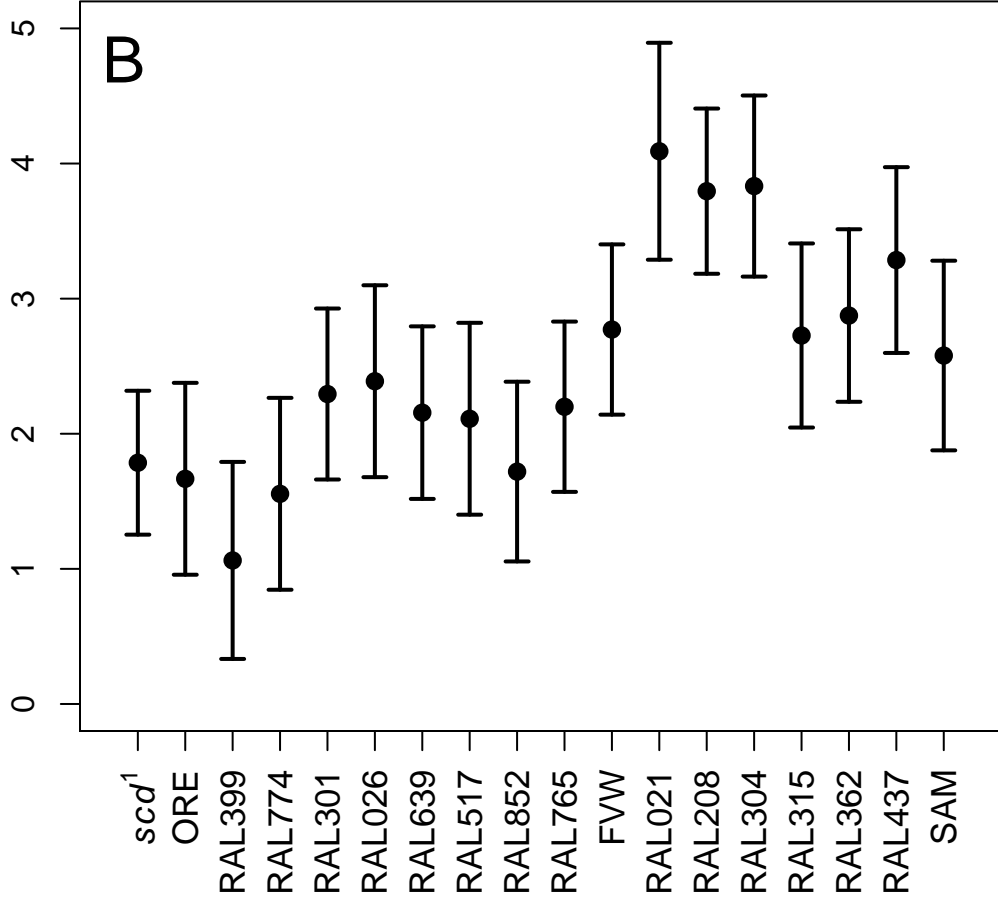

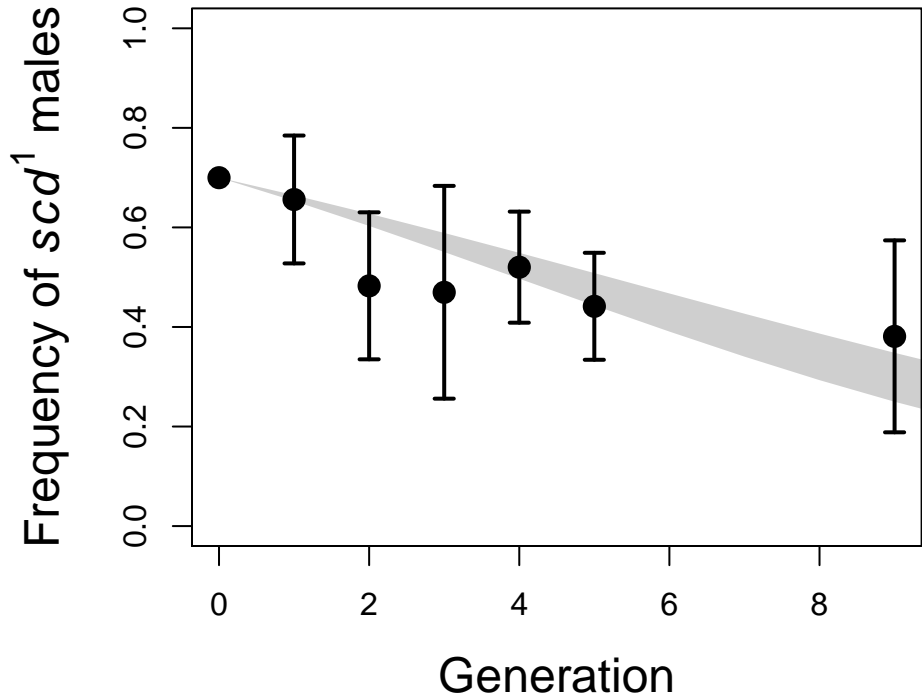

**A**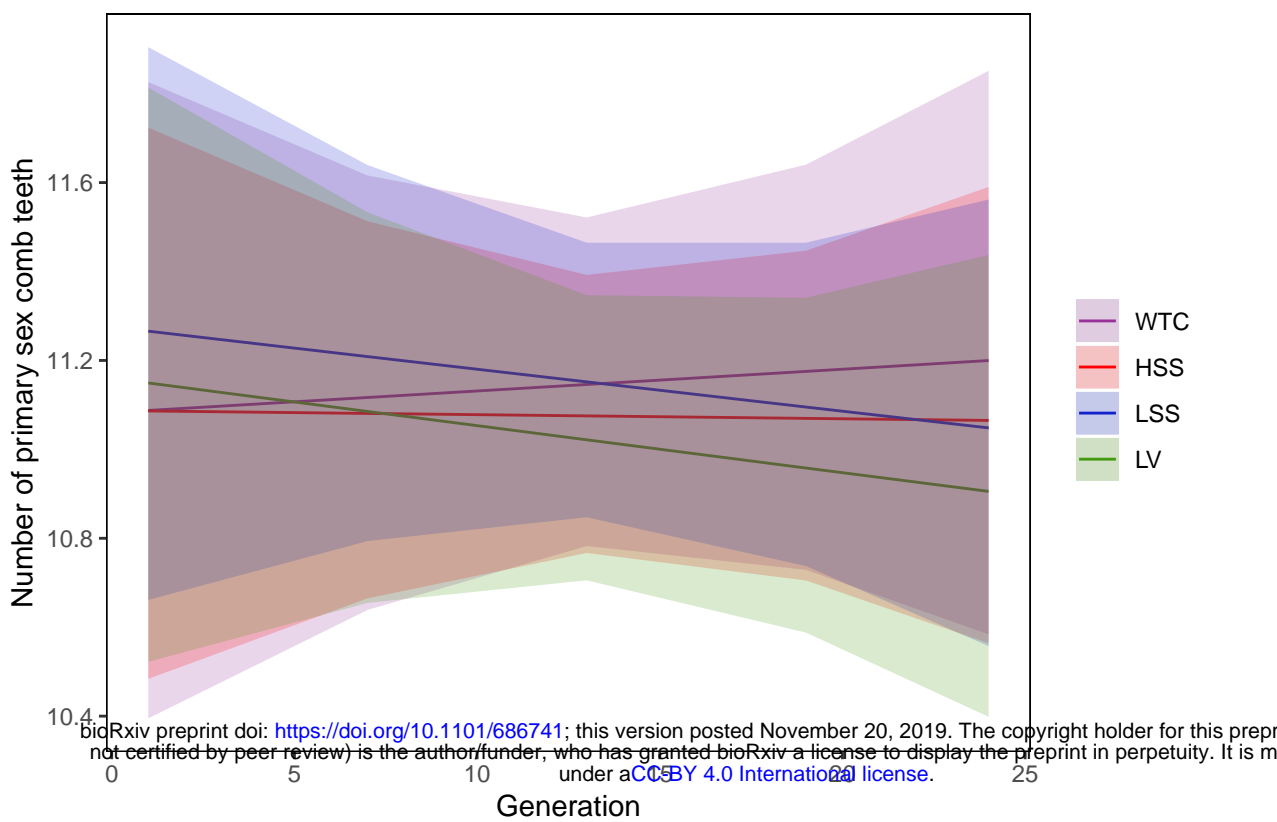**B**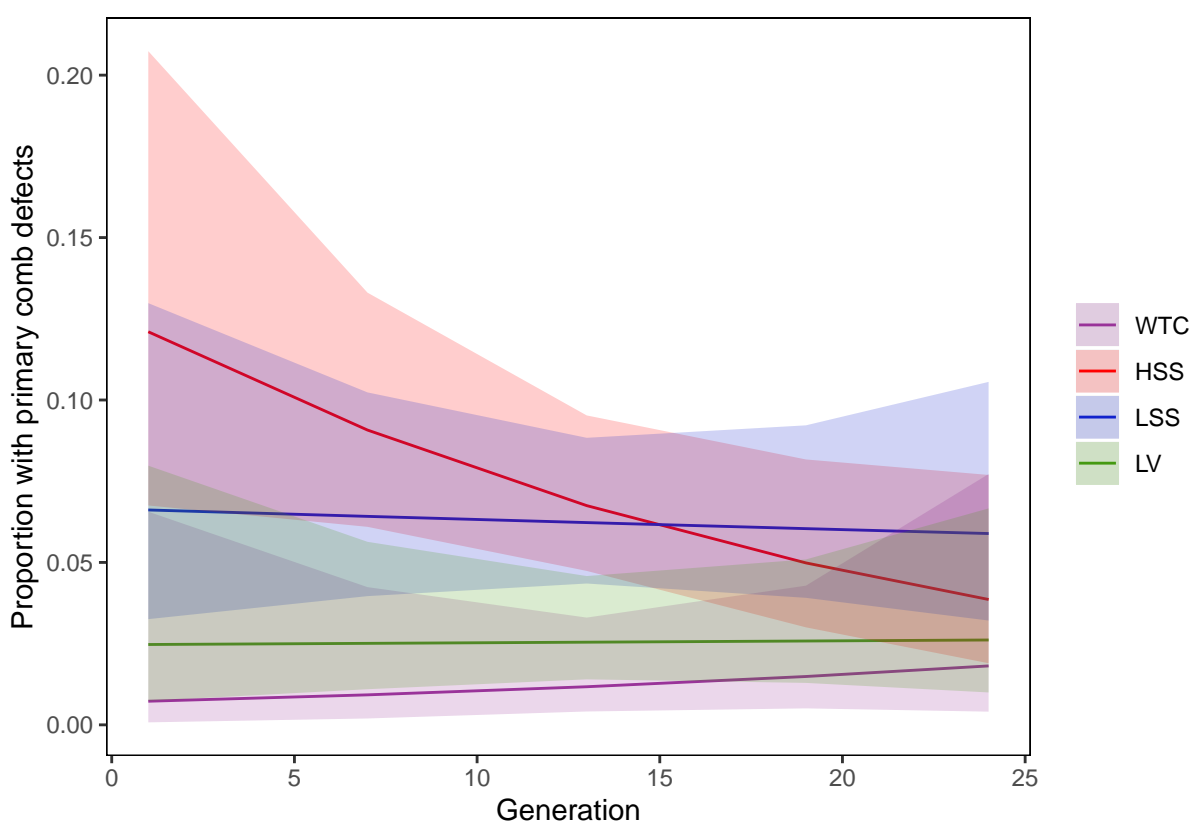**C**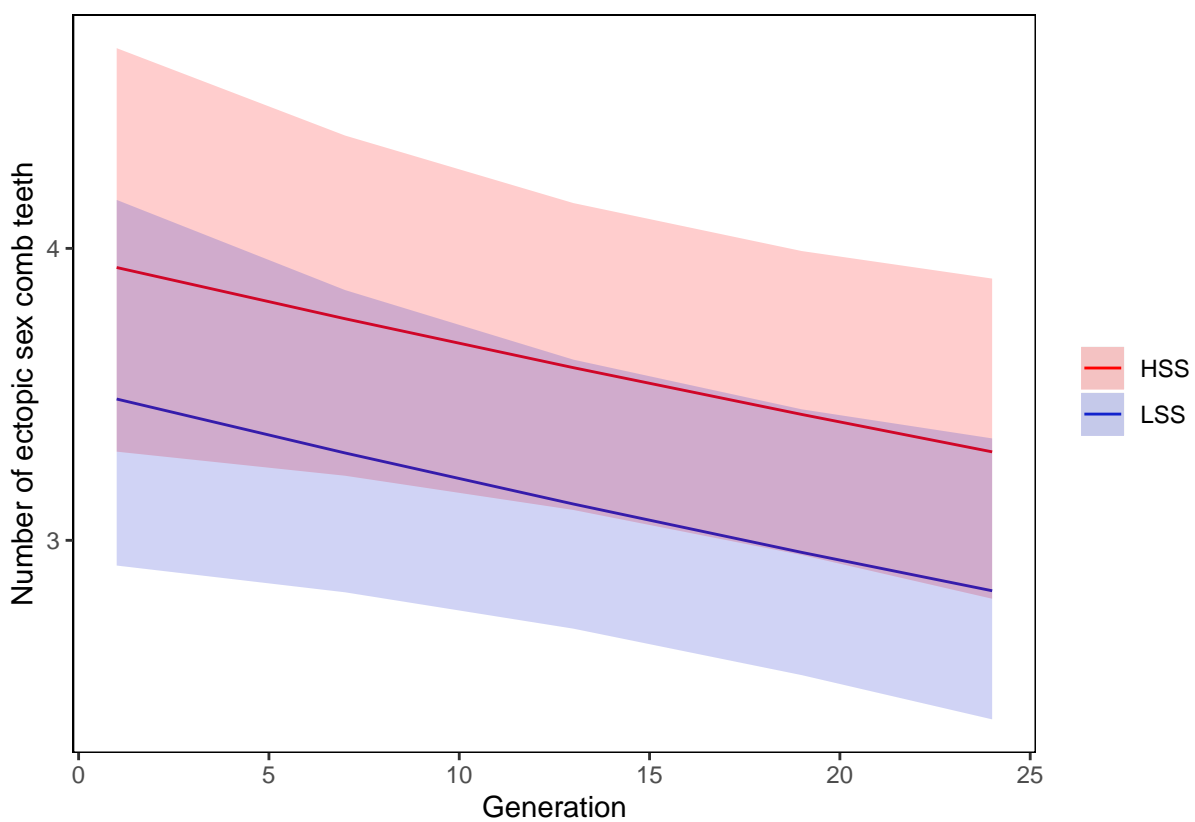

Source: https://www.biorxiv.org/content/10.1101/686741v2.full.pdf
